# Supplementary material
Source: HighWire-hosted journal article supplement (https://diabetes.diabetesjournals.org/content/suppl/2007/03/16/db06-0367)
Supplement: db0367onlineAPPENDIX.pdf [file db0367onlineAPPENDIX.pdf]

## **Appendices**

### *Appendix 1: Average Surface Area of Human Pancreatic Beta Cells*

In cells studied by both membrane-capacitance measurements and TIRF imaging, we found that the average human pancreatic beta cell had a basal capacitance of  $15 \pm 2$  pF and an average footprint area of  $410 \pm 40 \mu\text{m}^2$  ( $n=6$  cells). Using a specific capacitance of  $100 \mu\text{m}^2/\text{pF}$ , we calculate that the footprint region accounts for roughly 27% of the cell's total surface area.

### *Appendix 2: Percentage of Vesicles Secreted That Are Fluorescent*

In human pancreatic beta cells, the first depolarizing train of membrane-voltage steps stimulated an average increase in membrane capacitance of  $0.51 \pm 0.13$  pF. Assuming a unitary capacitance value of 2 pF/vesicle, this capacitance change corresponds to secretion of  $250 \pm 60$  vesicles, or  $0.18 \pm 0.06$  vesicles/ $\mu\text{m}^2$ . Within the footprint, the average density of fluorescent vesicle secretion in the same cells during the first stimulus was  $0.08 \pm 0.03$  fluorescent vesicles/ $\mu\text{m}^2$ . Thus, for the first stimulus, ~40% of total secretion was contributed by fluorescent vesicles. For the second stimulus, however, only ~25% of total secretion was contributed by fluorescent vesicles.
